# Supplementary material for: Derivation of aerosol fluorescence and water vapor Raman depolarization ratios from lidar measurements
Source: Copernicus journal article supplement (doi:10.5194/amt-2023-210), 2023-10-23
Supplement: Supplementary file [file amt-2023-210-RC1-supplement.pdf]

1 **Derivation of aerosol fluorescence and water vapor Raman depolarization ratios from lidar**  
2 **measurements**

3 Igor Veselovskii<sup>1</sup>, Qiaoyun Hu<sup>2</sup>, Philippe Goloub<sup>2</sup>, Thierry Podvin<sup>2</sup>, William Boissiere<sup>2</sup>, Mikhail  
4 Korenskiy<sup>1</sup>, Nikita Kasianik<sup>1</sup>, Sergey Khaykyn<sup>3</sup>, Robin Miri<sup>2</sup>

5  
6 <sup>1</sup>*Prokhorov General Physics Institute of the Russian Academy of Sciences, Moscow, Russia.*

7 <sup>2</sup>*Univ. Lille, CNRS, UMR 8518 - LOA - Laboratoire d'Optique Atmosphérique, F-59650 Lille,*  
8 *France*

9 <sup>3</sup>*Laboratoire Atmosphère Observations Spatiales, UVSQ, CNRS, Sorbonne University,*  
10 *Guyancourt, France*

11 **Correspondence:** Qiaoyun Hu (qiaoyun.hu@univ-lille.fr)

12  
13 **Abstract**

14 Polarization properties of the fluorescence induced by polarized laser radiation are widely  
15 considered in laboratory studies. In lidar observations, however, only the total scattered power of  
16 fluorescence is analyzed. In this paper we present results obtained with a modified Mie-Raman-  
17 Fluorescence lidar operated at the ATOLL observatory, Laboratoire d'Optique Atmosphérique,  
18 University of Lille, France, allowing to measure depolarization ratios of fluorescence at 466 nm  
19 ( $\delta_F$ ) and of water vapor Raman backscatter. Measurements were performed in May-June 2023  
20 during ~~the~~ Alberta forest fires season when smoke plumes were almost continuously transported over  
21 the Atlantic Ocean towards Europe. During the same period, smoke plumes from the same sources  
22 were also detected and analyzed in Moscow, at General Physics Institute (GPI), with a 5-channel  
23 fluorescence lidar able to measure fluorescence backscattering at 438, 472, 513, 560 and 614 nm.  
24 Results demonstrate that, inside the boundary layer (BL), urban aerosol fluorescence is maximal  
25 at 438 nm, then it gradually decreases with ~~wavelength~~ <sup>Planetary</sup> ~~Results~~ <sup>PBL</sup> also show that the maximum of ~~the~~ <sup>is</sup> smoke fluorescence spectrum shifted towards longer wavelengths. The smoke layers observed  
26 within 4-6 km <sup>heights</sup> present a maximum of fluorescence at 513 nm while, in the upper troposphere (UT),  
27 ~~the~~ <sup>fluorescence</sup> maximum shifts to 560 nm. Regarding fluorescence depolarization, ~~its~~ <sup>the</sup> value typically varies ~~within~~ <sup>( $\delta_F$ )</sup>  
28 ~~inside~~ the 45-55 % range, however several smoke ~~plume~~ <sup>PBL</sup> layers detected above 10 km were  
29 characterized by a  $\delta_F$  increasing up to 70%. Inside the BL, the fluorescence depolarization ratio  
30 was higher than that of smoke and varied inside the 50-70% range. Moreover, in the ~~BL~~ <sup>PBL</sup>,  $\delta_F$  appears  
31 <sup>particles</sup>

Our result

within

32 to vary with atmospheric relative humidity (RH) and, in contrast to the elastic scattering,  
33 ~~fluorescence depolarization~~ <sup>δ<sub>F</sub></sup> increases with RH.

34 The depolarization ratio of the water vapor Raman backscattering <sup>at 408 nm</sup> is shown to be quite low  
35 (2±0.5%) in the absence of fluorescence, because the narrowband interference filter in the water  
36 vapor channel selects only strongest ~~vibrational~~ <sup>the</sup> lines of the Raman spectrum. As a result,  
37 ~~depolarization~~ <sup>the</sup> of the water vapor Raman backscattering is sensitive to the presence of strongly  
38 depolarized fluorescence backscattering. The fluorescence contamination into the water vapor  
39 Raman channel can be calculated from the water vapor Raman depolarization ratio with the only  
40 assumption that δ<sub>F</sub> remains constant within the 408-466 nm range.

## 42 1. Introduction

43 Possibility <sup>(LIF)</sup> to measure the laser induced fluorescence becomes an important added-value to  
44 existing Mie-Raman lidars, because fluorescence measurements provide new independent  
45 information about aerosol properties. Nowadays, the spectroscopic lidars based on 32-channel  
46 PMT, <sup>a</sup> combined with spectrograph, proved the ability to measure the fluorescence spectrum  
47 (Sugimoto et al., 2012; Reichardt, 2014; Reichardt et al., 2018, 2023, Liu et al., 2022). On the  
48 other hand, ~~the~~ lidars, with a single fluorescence channel can be widespread due to their simplicity  
49 (Rao et al., 2018; Veselovskii et al., 2020). Such single-channel fluorescence ~~measurements~~ <sup>lidars</sup>  
50 combined with depolarization ~~measurements~~ <sup>channels</sup> at elastic wavelength, provide new independent  
51 information about aerosol type (Veselovskii et al., 2022; Wang et al., 2023). However, in all lidar  
52 studies, only total scattered power was analyzed, while polarization properties of the fluorescence  
53 were ignored. At the same time, fluorescence depolarization measurements are widely used in  
54 laboratory research (Lakowicz, 2006). When polarized laser radiation is used for excitation, the  
55 fluorescence emission is also partly polarized and degree of ~~emission~~ <sup>its</sup> polarization (anisotropy)  
56 depends on the fluorescence lifetime, on the angle between excitation and emission dipoles, and  
57 on the rotational mobility of molecules (Lakowicz, 2006). In fluorescence spectroscopy the  
58 anisotropy is introduced as given by Eq.1 <sup>(cite literature)</sup>; comment:

$$59 \quad r = \frac{P_F^{\parallel} - P_F^{\perp}}{P_F^{\parallel} + 2P_F^{\perp}} \quad (1)$$

60 Here <sup>where</sup>  $P_F^{\parallel}$  and  $P_F^{\perp}$  are the powers of co- and cross-polarized fluorescence components. <sup>So</sup> In lidar  
61 measurements, however, ~~now commonly used parameter~~ <sup>fluorescence</sup> is the depolarization ratio, δ<sub>F</sub>, is given as:

★ The paper of Wang et al., 2023 refers to multi-wavelength lidar measurements using combined elastic-Raman-fluorescence data, the later using a 32-PMT lidar detector. I propose to omit this paper as it is not a pure single-channel fluo lidar.

$$\delta_F = \frac{P_F^\perp}{P_F^\parallel} \quad (2)$$

Therefore, the anisotropy is expressed as a function of the  $\delta_F$  as follows:  
 Anisotropy and depolarization ratio are two interconvertible parameters

$$r = \frac{1 - \delta_F}{1 + 2\delta_F} \quad (3)$$

For randomly oriented fluorophores with collinear absorption and emission dipoles, in the absence of rotational motion, the anisotropy is  $r=0.4$  (Lakowicz, 2006), which corresponds to  $\delta_F=33\%$ . This is the minimal value one can expect in lidar measurements, Existence of <sup>any</sup> the angle between absorption and emission dipoles, as well as molecule rotation in the process of emission will increase  $\delta_F$ . Thus, measurement of fluorescence depolarization ratio may bring additional information about atmospheric aerosol. <sup>as we will show below.</sup> Moreover, depolarization measurements help to analyze ~~the impact of fluorescence on water vapor Raman measurements.~~ <sup>→ This is also written in line 82.</sup>

Water vapor is a key atmospheric component playing essential role in the planet's radiative balance, and Raman lidars today are widely used for <sup>such</sup> vapor observations (Whiteman, 2003, Chouza et al., 2022 and references therein). However, when the UV laser beam passes through a smoke layer, the broadband fluorescence signal is induced and its spectrum includes the region of water vapor Raman lines. Thus, the signal in the water vapor channel (around 407.5 nm, when 354.7 nm <sup>laser</sup> radiation is <sup>emitted</sup> used for stimulation) becomes contaminated by the fluorescence backscatter signal (Immler et al., 2005; Immler and Schrems, 2005). This contamination can be reduced by decreasing the width of the transmission band in the water vapor channel down to tenths of nm. However, as it was shown recently, fluorescence still remains <sup>an</sup> the issue, especially inside the smoke layers in <sup>the upper free</sup> high troposphere (Chouza et al., 2022; Reichardt et al., 2023). <sup>Reichardt et al., 2018</sup>

<sup>moreover,</sup> Depolarization measurements provide an opportunity to monitor the presence of fluorescence signal in <sup>the</sup> Raman channels. The Q-branch of water vapor Raman lines (near 407.5 nm) provides a weakly depolarized backscatter, while fluorescence is strongly depolarized. Thus, the presence of fluorescence should increase the depolarization ratio of signal in the water vapor channel. Moreover, if <sup>the</sup> depolarization ratios of water vapor and fluorescence are known, the contribution of fluorescence to the measured water vapor mixing ratio (WVMR) can be evaluated.

In this article, <sup>we</sup> report and analyze, for the first time, <sup>the</sup> depolarization ratio of aerosol fluorescence and ~~depolarization ratio~~ of water vapor Raman backscatter from lidar observations performed at the ATOLL observatory (ATmospheric Observation at lILLe), Laboratoire

91 d'Optique Atmosphérique, University of Lille, during dense smoke events ~~that~~ <sup>on</sup> occurred ~~in~~ May -  
92 June 2023. We start with a description of the experimental setup in Sect.2.1 and derive, in Sect.  
93 2.2, the main equations for estimating the fluorescence contribution to the water vapor Raman  
94 channel. In the first part of the results section (Sect.3.1), the fluorescence depolarization ratio <sup>s</sup> over  
95 ATOLL <sup>gre</sup> is analyzed for different aerosol types. The measurements of fluorescence spectra  
96 performed with a new five-channel fluorescence lidar, operated in Moscow, are presented in  
97 Sect.3.2. In Sect. 3.3, we analyze <sup>the</sup> depolarization <sup>ratio</sup> in the water vapor Raman channel and estimate  
98 the contamination of fluorescence to the derived WVMR. ~~The article ended with a conclusion.~~

*profiles. Finally, in sect. 4 we present our conclusions.*

## 100 2. Experimental setup and data analysis

### 101 2.1 Lidar system

102 In our study, two lidar systems ~~were~~ <sup>are</sup> considered. The first one, LILAS ((Lille Lidar  
103 AtmosphereS) is a multiwavelength Mie-Raman-Fluorescence lidar, whereas the second one is a  
104 multiwavelength fluorescence lidar operated by General Physics Institute (GPI), Moscow (Veselovskii  
105 et al., 2023). Both systems are based on a tripled Nd:YAG laser (Q-Smart 450) with a 20 Hz  
106 repetition rate and pulse energy about 100 mJ at 355 nm. <sup>The</sup> Backscattered <sup>laser</sup> light in both systems is  
107 collected by a 40 cm aperture telescope and the lidar signals are digitized with ~~(Licel)~~ <sup>(Licel)</sup> transient  
108 recorders with 7.5 m range resolution, allowing simultaneous detection in the analog and photon  
109 counting mode.

110 LILAS allows the so called  $3\beta+2\alpha+3\delta$  configuration, including three particle  
111 backscattering ( $\beta_{355}$ ,  $\beta_{532}$ ,  $\beta_{1064}$ ), two extinction ( $\alpha_{355}$ ,  $\alpha_{532}$ ) coefficients along with three particle  
112 depolarization ratios. <sup>( $\delta_{355}$ ,  $\delta_{532}$ ,  $\delta_{1064}$ )</sup> The Raman channel with <sup>of</sup>  $407.54/0.3$  nm <sup>spectral width</sup> interference filter allows also water  
113 vapor profiling. At the end 2019, the lidar was modified to enable fluorescence measurements. A  
114 part of the fluorescence spectrum is selected by a wideband interference filter of 44 nm width  
115 centered at 466 nm (Veselovskii et al. 2020).

116 In the fluorescence lidar of GPI only 355 nm wavelength is emitted, while fluorescence is  
117 measured in five spectral intervals. The central wavelengths and widths of transmission bands are:  
118 438(29), 472(32), 513(29), 560(40) and 614(54) nm (Veselovskii et al., 2023). Thus, the  
119 fluorescence spectrum could be sampled. <sup>at five different wavelengths. ⊗</sup> At GPI, the measurements were performed at an angle  
120 of 48 deg to the horizon. The strong sunlight background restricts the fluorescence observations  
121 of both systems to <sup>only the</sup> nighttime hours.

⊗ I would ask the authors to <sup>4</sup> provide, in the Supplement section a figure showing the transmission spectra of the 5-wavelengths mentioned, so that the readers can see if there are overlapping transmission  $t$ -curves between the various filters. if any they the authors should refer to any induced errors in the detected lidar signals.

aerosol

122 Several properties can be derived from fluorescence. The fluorescence backscattering  
123 coefficient,  $\beta_{F\lambda}$ , at wavelength  $\lambda_F$ , is calculated from the ratio of fluorescence and nitrogen Raman  
124 backscattering signals, as described in Veselovskii et al. (2020). We remind that  $\beta_{F\lambda}$  is related to  
125 fluorescence signals integrated over the filter transmission band  $D_\lambda$ . In Moscow measurements are  
126 performed at five wavelengths, and to compare  $\beta_{F\lambda}$  between different channels one makes use of

127 the “fluorescence spectral backscattering coefficient”  $B_\lambda = \frac{\beta_{F\lambda}}{D_\lambda}$  (fluorescence backscattering per

128 spectral interval). LILAS has only one single fluorescence channel, therefore, when presenting  
129 data from LILAS, for the sake of simplicity, one uses notation  $\beta_{F466} = \beta_F$ . The intensive property  
130 characterizing aerosol fluorescence is the fluorescence capacity  $G_{F\lambda}$ , which is the ratio of the  
131 fluorescence backscattering at wavelength  $\lambda_F$  to backscattering coefficient at laser wavelength

132  $G_{F\lambda} = \frac{\beta_F}{\beta_\lambda}$ . This ratio, in principle, can be calculated for any laser wavelength. For LILAS

(Veselovskii et al., 2020)

133 observations  $G_{F\lambda}$  is calculated with respect to  $\beta_{532}$ , <sup>as</sup> because  $\beta_{532}$  is derived with rotational Raman  
134 scattering and is considered to be the most reliable. And again, when presenting LILAS data, for

(provide here citation and relevant accuracy)

135 simplicity one will use notation  $G_{F\lambda} = G_F$ . In this work, all profiles of aerosol properties are  
136 smoothed with the Savitzky – Golay method, using second order polynomials with 8 points in the  
137 window (provide citation here).

on  $\beta_{532}$

spatial

138 Additional information about the atmospheric thermodynamic state was available from  
139 radiosonde measurements performed at Herstmonceux (UK) and Beauvechain (Belgium) stations,  
140 located 160 km and 80 km away from the ATOLL observatory, respectively. When calculating the  
141 relative humidity, one then used the water vapor profiles measured by Raman lidar and temperature  
142 profiles provided by the radiosonde. data.

143 As discussed in <sup>Sect. 1</sup> the introduction, measurements of fluorescence depolarization ratio and  
144 depolarization of water vapor Raman backscatter are expected to bring new information about  
145 aerosol properties and fluorescence contamination in the water vapor Raman channel. In 2023,  
146 LILAS was upgraded to allow depolarization measurements at both 466 nm and 408 nm.

147 <sup>the</sup> Corresponding optical layout is shown in Fig.1. Dichroic mirrors DM separate <sup>the</sup> 387, 408 and 466  
148 nm components, while polarizing cubes split the components with polarizations oriented parallel  
149 (s) and perpendicular (p) <sup>emitted beam polarized laser beam.</sup> to the laser polarization. For both channels the polarizing cube PBS251

150 from ThorLabs was used. <sup>the</sup> Fluorescence depolarization ratio,  $\delta_F$ , and water vapor Raman scattering

The

151 depolarisation ratio,  $\delta w$ , are both defined and calculated as a ratio of the perpendicular to the  
 152 parallel respective components. Calibration was performed as described in Freudenthaler et al.  
 153 (2009). The uncertainty of calibration is estimated to be below 15% for both 466 and 408 nm  
 154 channels.

## 156 2.2 Expressions for estimating fluorescence impact on water vapor measurements.

157 As discussed in the recent work from Chouza et al. (2022) and Reichardt et al. (2023), the  
 158 broadband aerosol fluorescence is expected to contribute to the signal measured in water vapor  
 159 Raman channel. Below, we provides the basic equations for estimating this contribution, based  
 160 on the measurements of the depolarization ratio in the water vapor Raman channel. The  
 161 backscattered radiative power, at the laser wavelength  $\lambda_L$ , from distance  $z$ , can be modeled, after  
 162 background subtraction, by using the lidar equation:

$$163 P_L = O(z) \frac{1}{z^2} C_L \beta T_L^2 \quad (4)$$

164 Here  $O(z)$  is the geometrical overlap factor, which is assumed to be the same for all channels,  $C_L$   
 165 is a range independent constant, including efficiency of the detection channel.  $T_L$  is one-way atmospheric  
 166 transmission, describing light losses on the way from the lidar to distance  $z$  at wavelength  $\lambda_L$ .

$$167 T_L = \exp \left\{ - \int_0^z [\alpha^a(\lambda_L, z') + \alpha^m(\lambda_L, z')] dz' \right\} \quad (5)$$

168 Backscattering and extinction coefficients contain aerosol ( $a$ ) and molecular ( $m$ ) contributions:

$$169 \beta_{\lambda_L} = \beta_{\lambda_L}^a + \beta_{\lambda_L}^m \quad \text{and} \quad \alpha_{\lambda_L} = \alpha_{\lambda_L}^a + \alpha_{\lambda_L}^m.$$

170 Radiative power in nitrogen Raman, water vapor Raman, and fluorescence channels can be  
 171 written in a similar way:

$$172 P_R = O(z) \frac{1}{z^2} C_R \sigma_R N_R T_L T_R \quad (6)$$

$$173 P_W = O(z) \frac{1}{z^2} C_W N_W \sigma_W T_W T_L \quad (7)$$

$$174 P_F = O(z) \frac{1}{z^2} C_F \beta_F T_F T_L \quad (8)$$

175 Here  $C_R, C_W, C_F$  are the corresponding range independent constants. Terms  $T_R, T_V$ , and  $T_F$  are one-  
 176 way transmissions at wavelengths  $\lambda_R, \lambda_W, \lambda_F$ , corresponding to the centers of transmission bands of

177 the channels. <sup>the</sup> Terms  $N_R$  and  $N_W$  are the concentrations in nitrogen and water vapor molecules while  
 178  $\sigma_R$ ,  $\sigma_W$  are their Raman differential scattering cross sections respectively. The fluorescence  
 179 backscattering coefficient,  $\beta_F$ , is introduced the same way, as described in ~~Veselovskii et al.~~  
 180 (2020).

181 The power <sup>received at the</sup> of fluorescence signal that leaks to the water vapor channel is:

$$182 \quad P_{FW} = O(z) \frac{1}{z^2} C_W \beta_{FW} T_W T_L \quad (9)$$

183 <sup>where</sup> Here  $\beta_{FW}$  is fluorescence backscattering at wavelength  $\lambda_W$ . The WVMR,  $n_W$ , can be obtained from ~~Eq. 6 and Eq. 7~~ <sup>Eqs. 6 and 7</sup>  
 184 ~~Eq. 6 and Eq. 7~~, if the calibration constant  $K_W = \frac{C_R \sigma_R}{C_W \sigma_W}$  is known <sup>and is given by Eq. 10</sup> :

$$185 \quad n_W = K_W \frac{P_W T_R}{P_R T_W} \quad (10)$$

186 The fluorescence backscattering coefficient,  $\beta_F$ , derived from ~~Eq. 6 and Eq. 8~~ <sup>Eqs. 6 and 8</sup>, also contains  
 187 the calibration constant  $K_F$ . The procedure of calibration is described in Veselovskii et al. (2020).  
 188 Finally,  $\beta_F$  <sup>is given by Eq. 11</sup> reads as:

$$189 \quad \beta_F = K_F n_R \frac{P_F T_R}{P_R T_F} \quad (11)$$

190 <sup>where</sup> Here  $n_R = \frac{N_R(z)}{N_R(z=0)}$  <sup>the</sup> is relative change of number density of nitrogen molecules with height.

191 The fluorescence signal <sup>the</sup> in the water vapor channel can be expressed from  $P_F$  using parameter  $\eta$ ,  
 192 which depends on <sup>the</sup> ratio of fluorescence cross sections at wavelengths  $\lambda_W$  and  $\lambda_F$ , on the filters  
 193 width and on efficiency of both channels, ~~as~~ <sup>as</sup> follows:

$$194 \quad P_{FW} = P_F \eta \frac{T_W}{T_F} \quad (12)$$

195 The signal measured in the water vapor channel,  $\tilde{P}_W$ , is the addition of both water vapor  
 196 backscatter,  $P_W$ , and the fluorescence backscatter,  $P_{FW}$ ,

$$197 \quad \tilde{P}_W = P_W + P_{FW} = P_W + P_F \eta \frac{T_W}{T_F} \quad (13)$$

198 One should remember, that the fluorescence spectrum, even for the same type of aerosol, <sup>finally</sup> can vary  
 199 with altitude and from observation to observation, which influences  $\eta$ . To minimize this influence  
 200 it is desirable to keep  $\lambda_W$  and  $\lambda_F$  as close as possible.

201 If the signals <sup>received lidar</sup> in the water vapor Raman and fluorescence channels are separated into co-  
 202 polarized ( $\parallel$ ) and cross-polarized ( $\perp$ ) components, in respect to <sup>the e</sup> laser polarization state, their  
 203 powers <sup>at the</sup> in water vapor Raman channel are given respectively by Eq. 14 and Eq. 15: <sup>of the emitted laser beam</sup> as below:

204 
$$\tilde{P}_W^{\parallel} = P_W^{\parallel} + P_F^{\parallel} \eta \frac{T_W}{T_F} \quad (14)$$

205 
$$\tilde{P}_W^{\perp} = P_W^{\perp} + P_F^{\perp} \eta \frac{T_W}{T_F} = \delta_W P_W^{\parallel} + \delta_F P_F^{\parallel} \eta \frac{T_W}{T_F} \quad (15)$$

206 <sup>where</sup> ~~Here~~  $\delta_F$  and  $\delta_W$  are the fluorescence and water vapor Raman depolarization ratios, defined <sup>in Eq. 16</sup> as:

207 
$$\delta_F = \frac{P_F^{\perp}}{P_F^{\parallel}} \quad \text{and} \quad \delta_W = \frac{P_W^{\perp}}{P_W^{\parallel}} \quad (16)$$

208 Here we assume that depolarization ratio of fluorescence is the same at the wavelengths  $\lambda_W$  and  
 209  $\lambda_F$ . This assumption is usually valid, because <sup>light</sup> emission is normally from the lowest singlet state,  
 210 so the depolarization ratio is spectrally independent (Lakowicz, 2006).

211 Due to the presence of fluorescence, the depolarization ratio measured <sup>at</sup> in the water vapor  
 212 Raman channel is <sup>given by Eq. 17</sup> :

213 
$$\tilde{\delta}_W = \frac{\tilde{P}_W^{\perp}}{\tilde{P}_W^{\parallel}} = \frac{\delta_W P_W^{\parallel} + \delta_F P_F^{\parallel} \eta \frac{T_W}{T_F}}{P_W^{\parallel} + P_F^{\parallel} \eta \frac{T_W}{T_F}} \quad (17)$$

214 Here  $\delta_W$  is the depolarization ratio that would be measured in the water vapor Raman channel in  
 215 the absence of atmospheric fluorescence. From <sup>Eqs.</sup> Eq. 9, 10, 14, 15, 17 <sup>the</sup> parameter  $\eta$  can be derived  
 216 from lidar measurements, such as water vapor mixing ratio,  $\tilde{n}_v$ , depolarization ratio  $\tilde{\delta}_W$  and  
 217 fluorescence backscattering  $\beta_F$  :

218 
$$\eta = \frac{\tilde{n}_v}{\beta_F} \frac{K_F}{K_W} n_R \frac{(1 + \delta_F)(\tilde{\delta}_W - \delta_W)}{(1 + \tilde{\delta}_W)(\delta_F - \delta_W)} \quad (18)$$

$\tilde{n}_v$  - is not defined  
 - should be  $\tilde{n}_w$ ?  
 - If yes, what is "w"?

219 It should be <sup>not</sup> noted that the choice of calibration constants  $K_F$ ,  $K_W$  does not influence  $\eta$ , because  $\tilde{n}_w$   
 220 and  $\beta_F$  are calculated <sup>using</sup> with the same calibration constants. Finally, the increase of WVMR  $\Delta n_w$   
 221 induced by the fluorescence can be calculated <sup>following Eq. 19</sup> as follows:



$$\Delta n_w = K_w \frac{P_F \eta \frac{T_w}{T_F} \frac{T_R}{T_w}}{P_R} = \frac{K_w}{K_F} \eta \beta_F \frac{1}{n_R} \quad (19)$$

As soon as ~~the~~ parameter  $\eta$  is ~~found~~ <sup>calculated</sup> from Eq.18, we can estimate error  $\Delta n_w$  from  $\beta_F$ , which in ~~the~~ case of LILAS is measured at 466 nm. ~~In such estimation we have to assume that relationship~~ <sup>(Veselovskii et al., 2023)</sup> between fluorescence at 466 nm and 408 nm ~~is constant~~ <sup>remains with height</sup> ~~(independent of height)~~. Possibility to perform correction from single – channel fluorescence measurements was discussed by Reichardt et al. (2023), where it was shown, that for 466/408 nm channels, correction actually may depend on height. ~~Corresponding analysis based on our measurements will be presented in Sect.3.2.~~ <sup>The</sup> ~~Corresponding analysis based on our measurements will be presented in Sect.3.2.~~ <sup>in detail</sup>

We should mention ~~that~~ <sup>the</sup> when depolarization ~~of~~ <sup>at the</sup> water vapor Raman ~~is available~~ <sup>channel</sup>, the contribution of fluorescence to WVMR can be obtained without using  $\eta$ . From ~~Eq.18 and Eq.19 it~~ <sup>comes:</sup> ~~comes:~~ <sup>Eqs. 18 and 19 we obtain:</sup>

$$\Delta n_w = \tilde{n}_w \frac{(1 + \delta_F)(\tilde{\delta}_w - \delta_w)}{(1 + \tilde{\delta}_w)(\delta_F - \delta_w)} \quad (20)$$

However, such correction can be performed only at low altitudes, where ~~signal-to-noise ratio~~ <sup>the</sup> ~~in~~ <sup>(SNR)</sup> ~~of the~~ cross-polarized water vapor channel is high enough. ~~(SNR > ...)~~ <sup>define SNR value</sup>

### 3. Experimental results

In May – June 2023, the Canadian forest fires were at the origin of numerous smoke layers observations in a wide range of altitude, ranging from the PBL to the tropopause. The Boreal wildfire season in 2023 started anomalously early. A wildfire in Alberta, Canada at 53.2° N, 115.7° W has produced an intense Pyrocumulonimbus (PyroCb) cloud on 5 May with the minimum satellite-derived infrared brightness temperature of -66° C, which should correspond to 10-11 km altitude according to ~~the~~ local radiosoundings. In order to describe the long-range transport of the smoke plume produced by this event, we use UV absorbing Aerosol Index (AI) measurements by the Ozone Monitoring and Profiling Suite (OMPS) Nadir Mapper (NM) instrument onboard Suomi NPP satellite mission (Flynn et al., 2014). AI is widely used as a proxy of the amount of absorbing aerosols (e.g smoke, dust, ash) and its dimensionless value is proportional to the altitude of the aerosol layers. ~~The~~ AI values above 15 are usually associated with ~~the~~ smoke plumes at or above the tropopause (Peterson et al., 2018 and references therein), whereas ~~the~~ maximum AI value ~~is~~ <sup>as</sup> reported by OMPS-NM instrument for the Alberta event ~~amounted to~~ <sup>reached</sup> 19.9.

## spatio-temporal

250 Fig. 2 displays the spatiotemporal evolution of the smoke plume from the Alberta event  
251 represented by the areas of enhanced AI observed between 5 – 21 May. The smoke in the upper  
252 troposphere and lower stratosphere (UTLS) is ~~carried~~<sup>advected</sup> by the westerly winds, crossing the Atlantic  
253 ~~in~~ about 1 week before reaching Moscow ~~region~~<sup>region</sup> by 15 May. On that date, the Moscow lidar has  
254 detected the smoke layer at 10-11 km (see Sect. 2).<sup>3.9</sup> The plume was then further advected across  
255 Eurasia towards northeastern Siberia. By 22 May the smoke plume completes its first  
256 circumnavigation (not shown) and passes over Lille on 23 May and then over Moscow for the  
257 second time around 27 May. Thus, we can expect, that the smoke layers observed over Lille and  
258 Moscow have the same source.

259

### 260 3.1 Variability of fluorescence depolarization ratio

261 At the first stage of our research we focused on the variability of the fluorescence  
262 depolarization ratio ~~with~~<sup>for</sup> aerosol types. The main attention was paid to smoke particles, because  
263 they provide the strongest impact on the Raman water vapor measurements due to their high  
264 fluorescence capacity. (citation....).

265 Spatio-temporal distributions of the aerosol elastic and fluorescence backscattering  
266 coefficients ( $\beta_{532}$  and  $\beta_F$ ), on the night 26-27 June 2023, are shown in Fig.3. Dense smoke layer  
267 with  $\beta_F$  as high as  $7.0 \times 10^{-4} \text{ Mm}^{-1} \text{ sr}^{-1}$  ~~occurs~~<sup>ok occurred</sup> within the 4.0 -10.0 km height range. The relative  
268 humidity increases ~~ed~~<sup>ed</sup> from 40% at 4 km to  $\text{RH} > 90\%$  at 7 km where formation of ice crystals starts ~~ed~~<sup>ed</sup>.

$\text{Mm}^{-1}$

269 Vertical profiles of aerosol elastic and fluorescence backscattering coefficients ( $\beta_{532}$  and  $\beta_F$ ),  
270 together with fluorescence capacity, are shown in Fig.3c. Inside the smoke layer,  $G_F$  is about  $3 \times 10^{-4}$   
271 <sup>(citation....)</sup>, which is a typical value for smoke whereas, above 6 km, it decreases due to ice formation. ~~ice~~<sup>The presence</sup>

272 ~~of ice~~<sup>of ice</sup> crystals increase ~~d~~<sup>d</sup> the particle depolarization ratio  $\delta_{532}$  from 3% at 6 km to 20% at 8 km.  
273 Fluorescence signals are strongly depolarized. Inside the BL,  $\delta_F$  is about 60% whereas above 2 km  
274 it drops ~~ped~~<sup>ped</sup> to approximately 45%. The processes of hygroscopic growth and ice formation do not  
275 provide a noticeable impact on  $\delta_F$  value. During May – June observations, the depolarization ratio  
276 of smoke varied mainly inside the 45-55% range.

277 As discussed in our previous publications (Veselovskii, et al., 2022; Hu et al., 2022), the  
278 fluorescence capacity of aged smoke varies inside the  $(2.5-5.5) \times 10^{-4}$  range, probably due <sup>to</sup> the  
279 changes in smoke composition and conditions of atmospheric transport. However, during ~~Alberta~~<sup>the</sup>  
280 fires, several smoke plumes with high  $G_F$  have been observed. The highest fluorescence capacity

281 was observed on the night 16-17 June 2023. Vertical profiles of aerosol properties for this episode  
282 are shown in Fig.4. Dense smoke layers with fluorescence backscattering exceeding  $10.0 \times 10^{-4}$   
283  $\text{Mm}^{-1}\text{sr}^{-1}$  occurred within <sup>the</sup> 7.0 -9.0 km height range. In this case, the maximal value of fluorescence <sup>the</sup>  
284 capacity reached  $10.0 \times 10^{-4}$ . Fluorescence depolarization ratio <sup>was measured</sup> is about 50% through the entire  
285 smoke layer and the process of ice formation (just like in Fig.3d) does not influence  $\delta_F$ . Thus, in  
286 May - June 2023 strong variations of  $G_F$  in the  $(2.5-10.0) \times 10^{-4}$  range were accompanied by  
287 relatively small variations of  $\delta_F$  remaining in the 45 - 55% interval. → Boers et al., 2019

288 It is known that in the UTLS smoke particles can reach depolarization ratio,  $\delta_{532}$ , as high as  
289 15-20% (Burton et al., 2015; Haarrig et al., 2018; Hu et al., 2019; Ohneiser et al., 2020). High  
290 values of the depolarization ratio are usually attributed to the complex internal structure of smoke  
291 particles (Mishchenko et al., 2016). Two smoke events in the UTLS, characterized by enhanced  
292  $\delta_{532}$ , on 28-29 May and 3-4 June 2023, are illustrated on Fig.5. On 28-29 May, three smoke layers,  
293 at  $\sim 3.5, 6.5$  and  $11.5$  km can be distinguished. High depolarization ratios, reaching 40% at altitudes  
294 of  $9.8-10.5$  km, are due to ice clouds. In the lower smoke plumes ranging between  $3.5$  and  $6.5$  km,  
295 the particle depolarization did not exceed 8%, whereas above  $11$  km  $\delta_{532}$  increases  $\downarrow$  to 15%. High  
296 values of  $\delta_{532}$  observed in the UTLS correlate <sup>well</sup> with increase of  $G_F$  and with fluorescence  
297 depolarization,  $\delta_F$ , up to  $7.0 \times 10^{-4}$  and 70%, respectively. Similar behavior was observed on 3-4  
298 June, where depolarization ratio,  $\delta_{532}$ , above  $11.5$  km increased up to 15%, simultaneously with an  
299 increase of  $G_F$  and  $\delta_F$  up to  $9.5 \times 10^{-4}$  and 70%, respectively. Thus, change in particle morphology  
300 may affect the depolarization ratio <sup>at</sup> of fluorescence. <sup>channel.</sup> Another possibility is that, in the UTLS, not  
301 only the particle structure can change, but <sup>the</sup> composition as well. At the current stage of analysis,  
302 we are not yet able to conclude about the mechanisms explaining the increase of fluorescence  
303 depolarization in the UTLS.

304 <sup>Furthermore</sup> We did not observe the effect of atmospheric humidity on smoke fluorescence  
305 depolarization. However, inside the <sup>P</sup>BL the observed hygroscopic growth was accompanied by an  
306 increase of  $\delta_F$ . During the 9-16 June 2023 period numerous particle hygroscopic growth cases were  
307 observed in the <sup>P</sup>BL. One of such cases, on the night of 12-13 June, is shown in Fig.6. The relative  
308 humidity increases  $\downarrow$  inside the BL from 50% to 70% causing an increase of  $\beta_{532}$  near the BL top.  
309 Depolarization ratio  $\delta_{532}$  decreases  $\downarrow$  with height, since the particles in the process of hygroscopic  
310 growth become more spherical. The fluorescence depolarization ratio, however, increases  $\downarrow$  inside  
311 the <sup>PBL</sup> boundary layer from 50 to 70%.

312 All results obtained during 9-16 June, showing dependence of  $\delta_F$  and  $\delta_{532}$  on the relative  
313 humidity, are summarized in Fig.7. Particle depolarization  $\delta_{532}$  systematically decreased with RH  
314 but, on 16 June, this dependence is not monotonic which could be due to the change of aerosol  
315 composition with height. At low RH (below 30%), fluorescence depolarization ratio <sup>values, the</sup> is about 50%.  
316 However, at RH about 90%,  $\delta_F$  increases <sup>was</sup> up to 70%. One possible explanation <sup>for that</sup> of  $\delta_F$  behavior can  
317 be an increase of rotational mobility of the molecules in the process of particle water uptake. (citation...)  
318

### 319 3.2 Fluorescence spectrum sampled with a with 5-channel lidar

320 The results presented in the previous section were obtained with a single channel  
321 fluorescence lidar. However, for analyzing the variability of smoke properties (for example,  
322 increase of fluorescence capacity with height) <sup>the</sup> it is important to have information about <sup>a wider</sup> total  
323 fluorescence spectrum. Moreover, to estimate the fluorescence contamination in the Raman water  
324 vapor channel, a relationship between fluorescence backscattering at 466 nm and 408 nm is used.  
325 Thus we need to know the variability of the fluorescence spectrum in the short wavelength region.  
326 In our recent work (Veselovskii et al., 2023) we presented the first results obtained with a 5-  
327 channel fluorescence lidar in operation at the GPI. This lidar is able to measure <sup>the</sup> fluorescence  
328 backscattering <sup>profiles at</sup> in 5 spectral intervals centered at 438, 472, 513, 560, and 614 nm. <sup>During</sup> In May – June  
329 2023, several smoke plumes originating from Alberta fires were transported over Moscow.  
330 Although Lille and Moscow are very distant from each other, smoke plumes <sup>(~... km)</sup> observed have the  
331 same origin, hence the fluorescence spectra measured over Moscow are quite helpful for the  
332 analysis of <sup>the</sup> Lille data.

333 Fig.8 presents <sup>(a,b,c) the</sup> fluorescence spectral backscattering coefficients,  $B_\lambda$ , for 3 smoke events  
334 detected in the UTLS above 10, 8 and 10 km for 15, 31 May and 20 June 2023, respectively. On  
335 15 and 31 May smoke layers <sup>were</sup> also present inside the 4-6 km range. Inside the <sup>P</sup> BL the strongest  
336 fluorescence <sup>was</sup> is systematically detected <sup>at</sup> in the 438 nm channel while, at higher altitudes, the  
337 maxima shifts <sup>ed</sup> to 560 nm. As follows from Fig.8d-f, the ratio  $B_{560}/B_{438}$  remains <sup>ed</sup> in the range 0.4 -  
338 0.7 inside the <sup>P</sup> BL whereas this ratio increases <sup>ed</sup> above 2.0 in the UTLS. Thus, for smoke events the  
339 maxima of the fluorescence spectrum shifts <sup>ed</sup> with height towards longer wavelengths. The ratio  
340  $B_{513}/B_{355}$  also increases <sup>ed</sup> with height and, above 10 km, it reaches <sup>ed</sup> the values of  $1 \times 10^{-5} \text{ nm}^{-1}$ . In the  
341 UTLS, the maximal fluorescence capacity,  $G_F$ , measured by LILAS at 466 nm (with 44 nm  
342 bandwidth filter) was about  $10 \times 10^{-4}$ . In the smoke layer, the ratio of backscattering coefficients

343  $\beta_{355}/\beta_{532}$  is about 2, so the maximal ratio  $B_{466}/\beta_{355}$  derived from LILAS measurements <sup>was</sup> is about  
344  $1.1 \times 10^{-5} \text{ nm}^{-1}$ . Thus, values obtained over Lille and over Moscow are in <sup>good</sup> agreement.

345 The fluorescence spectra obtained for the above mentioned smoke plumes are shown in  
346 Fig.9. The values of  $B_\lambda$  are normalized to  $B_{438}$ . Inside the BL, the maximum of fluorescence <sup>P</sup> is <sup>was</sup>  
347 measured at 438 nm and it decreases <sup>d</sup> with wavelength. In the smoke layers within 4 - 6 km, the  
348 maximum of fluorescence is observed at 513 nm while, in the UTLS, the maximum shifts <sup>ed</sup> to 560  
349 nm.

350 When applying Eq.19 to estimate the contribution of smoke fluorescence into the Raman  
351 water vapor channel of LILAS, we assume <sup>d</sup> that the ratio of the fluorescence backscattering at 466  
352 nm to 408 nm <sup>was</sup> is constant. For the lidar in operation at GPI, the shortest available wavelength <sup>is was</sup>  
353 438 nm, therefore, at least, one can estimate the variability of the ratio  $B_{472}/B_{438}$ . Fig. 10 presents <sup>the</sup>  
354 vertical profiles of  $B_{472}/B_{438}$  for 11 smoke events occurring during the 15 May – 20 June 2023  
355 period. Inside the <sup>P</sup>BL, this ratio varies <sup>d</sup> in the 0.6 – 1.0 range. <sup>The</sup> Lowest values correspond to urban  
356 aerosols while, values of  $B_{472}/B_{438}$  close to 1.0, probably indicate <sup>ing</sup> the presence of smoke particles  
357 inside the <sup>P</sup>BL. Smoke layers <sup>were observed</sup> start ~~mainly~~ above 4.0 km and  $B_{472}/B_{438}$  <sup>ed</sup> shows a tendency to increase  
358 in the UT. It is interesting that, for the period 15 May – 1 June, the ratio was close to 1.5 whereas  
359 after 1 June, it became close to 1.0, which can be related to changing of smoke source. Mean value  
360 of  $B_{472}/B_{438}$  in the 4.0 – 11.0 km range over all observations is 1.38 with standard deviation of 0.23  
361 (relative variation is about 17%). The wavelength separation between 466 nm and 408 nm channels  
362 is 1.7 <sup>nm</sup> larger, so one can expect <sup>a</sup> variation of  $B_{466}/B_{408}$  in the smoke layer up to ~30%. This is a very <sup>(citation ...)</sup>  
363 rough estimation, but it points out the difficulties to face when the estimation of the fluorescence  
364 contamination to the Raman water vapor channel is performed from a single fluorescence channel  
365 at 466 nm. This issue was also discussed <sup>by</sup> ~~in the publication of~~ Reichardt et al. (2023).  
366

### 367 **3.3 Estimation of fluorescence impact on water vapor Raman measurements**

368 Measuring the depolarization ratio <sup>at</sup> in the water vapor Raman channel provides an  
369 opportunity to control/evaluate the presence of fluorescence leak in this channel. These  
370 depolarization measurements were performed <sup>over</sup> in Lille during May – June 2023. Vertical profiles  
371 of water vapor depolarization ratio  $\tilde{\delta}_w$  together with  $\tilde{n}_w$ ,  $\beta_{532}$ ,  $\beta_F$ , and  $G_F$  are shown in Fig.11 for  
372 the night 8-9 and 10-11 June 2023. On 8-9 June aerosols are confined <sup>the</sup> mainly below 5 km. The  
373 fluorescence capacity <sup>was</sup> is about  $1.0 \times 10^{-4}$  below 3.0 km, but above,  $G_F$  increases <sup>ed</sup> up to  $2.5 \times 10^{-4}$ ,

374 indicating to the presence of smoke. The depolarization ratio in the water vapor channel is <sup>was</sup> about  
 375 2% in the height range 1.5 km – 3.5 km. <sup>particles.</sup> The values of  $\tilde{\delta}_w$  ranging <sup>where</sup> inside <sup>within</sup> 1.8%–2.0% were  
 376 observed <sup>at</sup> for this height range, where <sup>the</sup> contribution of fluorescence was insignificant.  
 377 <sup>The</sup> Depolarization ratio  $\delta_w$  <sup>was</sup> is low, because the interference filter <sup>at the</sup> in water vapor channel selects only <sup>the</sup>  
 378 strongest Q-branch lines and most of rotational lines are blocked. <sup>The c</sup> Contribution of fluorescence  
 379 becomes noticeable above 3.5 km where  $n_w$  drops <sup>red</sup>, resulting in an increase of  $\tilde{\delta}_w$  up to ~3%. <sup>Below 1.0 km height</sup> There  
 380 <sup>we observed</sup> is also increase of  $\tilde{\delta}_w$  up to 2.2% <sup>can</sup> below <sup>1.0 km</sup>, where fluorescence backscattering is enhanced.  
 381 Similar values of  $\tilde{\delta}_w$  were observed on 10-11 June, where <sup>the</sup> depolarization ratio increases <sup>d</sup> up to  
 382 2.5% inside the smoke layer observed at ~3.75 km and below 2.0 km.

383 As discussed in <sup>s</sup> section 2.2, the contribution of fluorescence to the WVMR <sup>channel</sup> can be derived  
 384 from Eq.20 if  $\tilde{\delta}_w$  and  $\delta_f$  are measured. Fig.12 presents the modeling of the relative error  $\frac{\Delta n_w}{\tilde{n}_w}$ ,  
 385 introduced by the fluorescence <sup>the channel</sup> to WVMR as a function of  $\tilde{\delta}_w$ . <sup>The</sup> Computations are performed for <sup>different</sup>  
 386 fluorescence depolarization ratio  $\delta_f=50\%, 60\%, 70\%$  to include both smoke and urban particles.

387 <sup>A</sup> Depolarization ratio in the Raman water vapor channel in the absence of fluorescence was assumed  
 388 to be  $\delta_w=2\%$ . For <sup>or</sup> depolarization ratio  $\tilde{\delta}_w$  below 3% the relative error  $\frac{\Delta n_w}{\tilde{n}_w}$  did not exceed 3%.

389 As follows from the fluorescence spectra in Fig.9, the fluorescence of urban particles increases  
 390 towards short <sup>es</sup> wavelengths, thus one can expect impact of the urban aerosol fluorescence <sup>on</sup> on vapor <sup>the water</sup>  
 391 measurements. <sup>s</sup> In practices, however, we did not observe <sup>values of</sup>  $\tilde{\delta}_w$  exceeding 3% in the <sup>P</sup>BL, thus,  
 392 contribution of aerosol in the BL is not critical. The reason is due to the low fluorescence capacity <sup>the</sup>  
 393 (about one order lower than that of smoke) and higher water vapor content, comparing to free  
 394 troposphere.

395 <sup>The</sup> Vertical <sup>any</sup> profiles of  $\tilde{\delta}_w$  <sup>are</sup> shown in Fig.11 become noisy at heights where  $n_w$  is low, and  $\tilde{\delta}_w$  <sup>thus</sup> can't be  
 396 used for correction of fluorescence effect in the <sup>the</sup> UT. To overcome this, <sup>upper troposphere.</sup> we <sup>we</sup> derived the parameter  
 397  $\eta$  from Eq.18 at low altitudes where  $\tilde{\delta}_w$  <sup>values are</sup> is available, and, then, <sup>thus, these  $\eta$  values can be</sup> this <sup>is</sup> used to calculate  $\Delta n_w$  from  
 398 Eq.19 in the entire height range. In such an approach, however, one has to assume that relationship <sup>the</sup>  
 399 between fluorescence cross sections at 466 nm and 408 nm remains constant with height. As

Section ...

discussed in ~~previous section~~, such assumption can yield significant bias in calculation of  $\Delta n_w$ , and, at this stage, we do not provide corrected profiles of WVMR.

For accurate calculation of  $\eta$  one needs smoke events with strongly enhanced  $\tilde{\delta}_w$ , which is usually observed in the dry smoke layers. Such suitable events are shown for the night 26-27 May and 5-6 June 2023 in Fig.13. On 26-27 May a smoke layer characterized by high fluorescence ( $\beta_F$  up to  $5 \times 10^{-4} \text{ Mm}^{-1} \text{sr}^{-1}$ ) and low  $\tilde{n}_w$  (below 0.2 g/kg) is observed at 3.5 km. Fluorescence depolarization ratio is about 47% and  $\tilde{\delta}_w$  increases from 2% up to 12% in the middle of this layer. Parameter  $\eta$  calculated from Eq.18 inside this smoke layer is about  $2 \times 10^{-3} \text{ (g/kg)/(Mm}^{-1} \text{sr}^{-1})$ . On 5-6 June the depolarization ratio  $\tilde{\delta}_w$  in the smoke layer increased up to 10% and value of  $\eta$  is very similar. Parameters  $\eta$  derived for several smoke episodes vary in the range  $(2 \div 2.5) \times 10^{-3} \text{ (g/kg)/(Mm}^{-1} \text{sr}^{-1})$ . For the estimate of  $\Delta n_w$  we used the mean value of  $\eta = 2.25 \times 10^{-3} \text{ (g/kg)/(Mm}^{-1} \text{sr}^{-1})$ , which is suitable only for smoke, while for particles in the BL,  $\eta$  can be different. However, in the BL, low depolarization ratio  $\tilde{\delta}_w$  prevented us from calculating  $\eta$ .

Fig.14 presents vertical profiles of WVMR, fluorescence backscattering and error  $\Delta n_w$  introduced by the fluorescence in WVMR on 26-27 May, 28-29 May and 16-17 June. Smoke layers with strong fluorescence occurred systematically in our ~~UT~~ upper tropospheric observations. The current LILAS system is not powerful enough for deriving accurate water vapor measurements above 10 km, however increase of  $\tilde{n}_w$  in fluorescent smoke layers is visible. We remind that Eq.19 for  $\Delta n_w$  contains factor  $\frac{1}{n_R}$  (inverse relative change of nitrogen number density), thus, the fluorescence impact on WVMR increases with height. The uncertainties  $\frac{\Delta n_w}{\tilde{n}_w}$  for all events considered are shown in Fig.14d. On 26-27 and 28-29 May the uncertainty at 11 km is of the order of 100%. On 16 June the smoke layer is lower (at 9 km) and the uncertainty is about 50%. Our demonstration shows that smoke fluorescence can significantly impact water vapor measurements. The proposed approach, based on the analysis of the depolarization ratio of the water vapor signal, has potential for estimating the corresponding errors and their correction.

#### 4. Conclusion

→ define have what errors you are referring to.

426 Modern fluorescence spectroscopy widely uses depolarization measurements of the  
427 fluorescence emission induced by polarized laser radiation. However, in ~~the application to~~ <sup>the</sup> lidar ~~atmospheric observations,~~ <sup>the</sup> measurement of fluorescence depolarization ratio, presented in this  
428 study, is one of the first efforts <sup>to</sup> in this direction. ~~An~~ <sup>The</sup> analysis of more than 30 spring and summer  
429 smoke events allows evaluation of the main aerosol intensive properties, including fluorescence  
430 capacity, particle and fluorescence depolarization ratio. The fluorescence capacity varied within  
431  $(2.5 \div 10.0) \times 10^{-4}$  ~~range~~ while the particle depolarization ratio  $\delta_{532}$  remained below 10%. However,  
432 in spite of strong  $G_F$  variation,  $\delta_F$  was remaining within a relatively narrow interval 45-55%.  
433 Additional observations revealed that for smoke plumes in the upper troposphere  $\delta_{532}$  increased up  
434 to 15% and <sup>the</sup> fluorescence depolarization increased up to 70%. At the moment, one cannot fully  
435 explain the mechanism responsible for this  $\delta_F$  increase. It can be related to complex particle  
436 internal structure at high altitudes, as well as to the change of the chemical composition, revealed  
437 by the shift of the maximum of fluorescence spectra to longer wavelengths in the upper troposphere  
438 (Fig. 9).

440 Inside the <sup>D</sup>BL, the fluorescence depolarization ratio was higher than that of smoke and varied  
441 <sup>within</sup> ~~inside~~ the 50-70% range. Moreover, fluorescence depolarization ratio of urban particles strongly  
442 depends on the relative humidity and, in contrast to <sup>the</sup> elastic scattering, <sup>the</sup> depolarization of  
443 fluorescence increases with RH. One possible origin of this phenomena could be attributed to an  
444 increase of rotational mobility of the molecules involved in the process of water uptake since  $\delta_F$   
445 increases when <sup>the</sup> rotation time of molecules becomes comparable with time <sup>of</sup> fluorescence  
446 emission.

447 The depolarization ratio of Raman water vapor backscatter, in the absence of fluorescence,  
448 <sup>ed</sup> appears to be quite low ( $\delta_W = 2 \pm 0.5\%$ ), because the narrowband interference filter in the water vapor <sup>(0,3nm)</sup>  
449 channel selects only <sup>the</sup> strong Q-lines of the Raman spectrum. As a result, the depolarization ratio of <sup>the</sup>  
450 Raman water vapor backscatter is sensitive to the presence of strongly depolarized fluorescence  
451 signals. <sup>These</sup> Contribution of fluorescence to the WVMR can be calculated from  $\tilde{\delta}_W$  with the only  
452 assumption that  $\delta_F$  remains constant within 408 - 466 nm. However, the depolarization ratio of <sup>the</sup>  
453 Raman water vapor backscatter is weak and measurements are only possible up to the middle  
454 troposphere with the lidar used in <sup>this</sup> ~~the~~ work, while the problem of fluorescence interference <sup>is</sup> ~~is~~ <sup>remains</sup> ~~the~~  
455 most crucial in UTLS. To solve this problem, one can derive  $\eta$ , a parameter linking fluorescence



456 at 466 nm and at 408 nm. This parameter is calculated for specific smoke events, at low altitudes,  
457 and then <sup>can be</sup> is used for processing <sup>lidar</sup> all observations <sup>at</sup> and altitudes. <sup>at higher</sup> over the PBL.

458 Such an approach relies on the assumption that the ratio of fluorescence between 466 nm  
459 and 408 nm remains constant and allows only a rough estimation of the correction term for the  
460 water vapor mixing ratio,  $\Delta n_w$ . One possible solution to <sup>increase the</sup> improve accuracy of  $\Delta n_w$  is to implement  
461 an additional and shorter wavelength channel (438 nm or even shorter). Another technical solution  
462 could be considered as the depolarization ratio of Raman water vapor backscatter is low, therefore  
463 the 408 nm <sup>channel</sup> component can be efficiently <sup>implemented</sup> selected with a polarizing cube. <sup>As the</sup> The depolarized channel <sup>is</sup> <sup>equipped</sup> then can be used for fluorescence measurements. <sup>Thus, the</sup> Polarizing cube <sup>works</sup> in a wide spectral range, <sup>at 408</sup>  
464 so one can select the region outside of the water vapor spectrum (400 nm – 418 nm) for <sup>nm</sup>  
465 fluorescence monitoring. We plan this experiment as well as other innovative approaches with our  
466 future <sup>high</sup> power fluorescence lidar, LIFE (Laser Induced Fluorescence Explorer), whose start of  
467 operation is scheduled <sup>for</sup> at the beginning of 2024.

470 **Data availability.** Lidar measurements are available upon request  
471 (philippe.goloub@univ-lille.fr).

472  
473 **Author contributions.** IV processed the data and wrote the paper. QH and TP performed the  
474 measurements in Lille. PG supervised the project and helped with paper preparation. WB modified  
475 LILAS for polarization measurements. MK and NK performed the measurements in Moscow. SK  
476 analyzed transport of smoke layers and RM derived RH profiles from lidar measurements.

477  
478 **Competing interests.** The authors declare that they have no conflict of interests.

## 480 Acknowledgement

481 We acknowledge funding from the CaPPA project funded by the ANR through the PIA under  
482 contract ANR-11-LABX-0005-01, the “Hauts de France” Regional Council (project ECRIN) and  
483 the European Regional Development Fund (FEDER). ESA/QA4EO program is greatly  
484 acknowledged for supporting the observation activity at LOA. The work from Q. Hu was  
485 supported by Agence Nationale de Recherche ANR (ANR-21-ESRE-0013) through the  
486 OBS4CLIM project. Development of fluorescence lidar in Moscow was supported by Russian  
487 Science Foundation (project 21-17-00114). The work of S. Khaykin was partly supported by the  
488 Agence Nationale de la Recherche (ANR) 21-CE01- 335 0007-01 PyroStrat project.

489

490 **References**

491 Baars, H., et al., *Atmos. Chem. Phys.*, **19**, 15183–15198, 2019.

492 Burton, S.P., Hair, J.W., Kahnert, M., Ferrare, R.A., Hostetler, C.A., Cook, A.L., Harper, D.B.,  
493 Berkoff, T.A., Seaman, S.T., Collins, J.E., Fenn, M.A., and Rogers, R.R.: Observations of the  
494 spectral dependence of linear particle depolarization ratio of aerosols using NASA Langley  
495 airborne High Spectral Resolution Lidar, *Atmos. Chem. Phys.*, **15**, 13453–13473,  
496 <https://doi.org/10.5194/acp-15-13453-2015>, 2015.

497 Chouza, F., Leblanc, T., Brewer, M., Wang, P., Martucci, G., Haeefe, A., Vérémes, H., Dufлот,  
498 V., Payen, G., and Keckhut, P.: The impact of aerosol fluorescence on long-term water vapor  
499 monitoring by Raman lidar and evaluation of a potential correction method, *Atmos. Meas.*  
500 *Tech.*, **15**, 4241–4256, <https://doi.org/10.5194/amt-15-4241-2022>, 2022.

501 Flynn, L., Long, C., Wu, X., Evans, R., Beck, C. T., Petropavlovskikh, I., McConville, G.,  
502 Yu, W., Zhang, Z., Niu, J., Beach, E., Hao, Y., Pan, C., Sen, B., Novicki, M., Zhou, S., Seftor,  
503 C.: Performance of the Ozone Mapping and Profiler Suite (OMPS) products, *J. Geophys. Res.*  
504 *Atmos.*, **119**, 6181–6195, 2014. doi:10.1002/2013JD020467

505 Freudenthaler, V., Esselborn, M., Wiegner, M., Heese, B., Tesche, M. and co-authors:  
506 Depolarization ratio profiling at several wavelengths in pure Saharan dust during SAMUM  
507 2006, *Tellus* 61B, 165–179, 2009.

508 Haarig, M., Ansmann, A., Baars, H., Jimenez, C., Veselovskii, I., Engelmann, R., and Althausen,  
509 D.: Depolarization and lidar ratios at 355, 532, and 1064 nm and microphysical properties of  
510 aged tropospheric and stratospheric Canadian wildfire smoke, *Atmos. Chem. Phys.*, **18**, 11847-  
511 11861, <https://doi.org/10.5194/acp-18-11847-2018>, 2018.

512 Hu, Q., Goloub, P., Veselovskii, I., Bravo-Aranda, J.-A., Popovici, I. E., Podvin, T., Haeffelin,  
513 M., Lopatin, A., Dubovik, O., Pietras, C., Huang, X., Torres, B., and Chen, C.: Long-range-  
514 transported Canadian smoke plumes in the lower stratosphere over northern France, *Atmos.*  
515 *Chem. Phys.*, **19**, 1173-1193, 2019. <https://doi.org/10.5194/acp-19-1173-2019>.

516 Hu, Q., Goloub, P., Veselovskii, I., and Podvin, T.: The characterization of long-range transported  
517 North American biomass burning plumes: what can a multi-wavelength Mie-Raman-  
518 polarization-fluorescence lidar provide? *Atmos. Chem. Phys.* **22**, 5399–5414, 2022  
519 <https://doi.org/10.5194/acp-22-5399-2022>

- 520 Immler, F. and Schrems, O.: Is fluorescence of biogenic aerosols an issue for Raman lidar  
521 measurements? Proc. SPIE 5984, Lidar Technologies, Techniques, and Measurements for  
522 Atmospheric Remote Sensing, 59840H, <https://doi.org/10.1117/12.628959>, 2005.
- 523 Immler, F., Engelbart, D., and Schrems, O.: Fluorescence from atmospheric aerosol detected by a  
524 lidar indicates biogenic particles in the lowermost stratosphere, *Atmos. Chem. Phys.*, 5, 345–  
525 355, <https://doi.org/10.5194/acp-5-345-2005>, 2005.
- 526 Lakowicz, J. R.: Principles of Fluorescence Spectroscopy, Springer New York, NY, 2006.  
527 <https://doi.org/10.1007/978-0-387-46312-4>
- 528 Liu, F., Yi, F., He, Y., Yin, Z., Zhang, Y., and Yu, C.: Spectrally Resolved Raman Lidar to  
529 Measure Backscatter Spectra of Atmospheric Three-Phase Water and Fluorescent Aerosols  
530 Simultaneously: Instrument, Methodology, and Preliminary Results, *IEEE Transactions on*  
531 *Geoscience and Remote Sensing*, 60, 5703013, 2022, doi: 10.1109/TGRS.2022.3166191
- 532 Mishchenko MI, Dlugach JM, Liu L. Linear depolarization of lidar returns by aged smoke  
533 particles. *Appl Opt.* 55, 9968-9973, doi: 10.1364/AO.55.009968, 2016.
- 534 Ohneiser, K., Ansmann, A., Baars, H., Seifert, P., Barja, B., Jimenez, C., Radenz, M., Teisseire,  
535 A., Floutsi, A., Haarig, M., Foth, A., Chudnovsky, A., Engelmann, R., Zamorano, F., Bühl,  
536 J., and Wandinger, U.: Smoke of extreme Australian bushfires observed in the stratosphere  
537 over Punta Arenas, Chile, in January 2020: optical thickness, lidar ratios, and depolarization  
538 ratios at 355 and 532 nm, *Atmos. Chem. Phys.*, 20, 8003–8015, [https://doi.org/10.5194/acp-](https://doi.org/10.5194/acp-20-8003-2020)  
539 [20-8003-2020](https://doi.org/10.5194/acp-20-8003-2020), 2020.
- 540 Peterson, D.A., Campbell, J.R., Hyer, E.J. et al. Wildfire-driven thunderstorms cause a volcano-  
541 like stratospheric injection of smoke, *npj Clim. Atmos. Sci.* 1, 30, 2018.  
542 <https://doi.org/10.1038/s41612-018-0039-3>
- 543 Rao, Z., He, T., Hua D, Wang, Y., Wang, X., Chen, Y., Le J.: Preliminary measurements of  
544 fluorescent aerosol number concentrations using a laser-induced fluorescence lidar, *Appl. Opt.*  
545 *57*, 7211-7215, <https://doi.org/10.1364/AO.57.007211>, 2018.
- 546 Reichardt, J.: Cloud and aerosol spectroscopy with Raman lidar, *J. Atmos. Ocean. Tech.*, 31,  
547 1946–1963, <https://doi.org/10.1175/JTECH-D-13-00188.1>, 2014.
- 548 Reichardt, J., Leinweber, R., Schwebe, A.: Fluorescing aerosols and clouds: investigations of co-  
549 existence, *EPJ Web Conf.*, 176, 05010, <https://doi.org/10.1051/epjconf/201817605010>, 2018.

Richardson, S., et al., *Science of the Total Environment*,  
696 (2019), 133906

- 550 Reichardt, J., Behrendt, O., and Laueremann, F.: Spectrometric fluorescence and Raman lidar:  
551 absolute calibration of aerosol fluorescence spectra and fluorescence correction of humidity  
552 measurements, *Atmos. Meas. Tech.*, 16, 1–13, 2023. <https://doi.org/10.5194/amt-16-1-2023>.
- 553 Sugimoto, N., Huang, Z., Nishizawa, T., Matsui, I., Tatarov, B.: Fluorescence from atmospheric  
554 aerosols observed with a multichannel lidar spectrometer," *Opt. Expr.* 20, 20800-20807,  
555 <https://doi.org/10.1364/OE.20.020800>, 2012.
- 556 Veselovskii, I., Hu, Q., Goloub, P., Podvin, T., Korenskiy, M., Pujol, O., Dubovik, O., Lopatin,  
557 A.: Combined use of Mie-Raman and fluorescence lidar observations for improving aerosol  
558 characterization: feasibility experiment, *Atm. Meas. Tech.*, 13, 6691–6701, 2020.  
559 [doi.org/10.5194/amt-13-6691-2020](https://doi.org/10.5194/amt-13-6691-2020).
- 560 Veselovskii, I., Hu, Q., Goloub, P., Podvin, T., Barchunov, B., and Korenskiy, M.: Combining  
561 Mie–Raman and fluorescence observations: a step forward in aerosol classification with lidar  
562 technology, *Atmos. Meas. Tech.*, 15, 4881–4900, 2022b. [https://doi.org/10.5194/amt-15-](https://doi.org/10.5194/amt-15-4881-2022)  
563 [4881-2022](https://doi.org/10.5194/amt-15-4881-2022).
- 564 Veselovskii, I., Kasianik, N., Korenskiy, M., Hu, Q., Goloub, P., Podvin, T., and Liu, D.:  
565 Multiwavelength fluorescence lidar observations of smoke plumes, *Atmos. Meas. Tech.*, 16,  
566 2055–2065, 2023. <https://doi.org/10.5194/amt-16-2055-2023>
- 567 Wang, Y., Huang, Z., Zhou, T., Bi, J., Shi J.: Identification of fluorescent aerosol observed by a  
568 spectroscopic lidar over northwest China, *Optics Express*, 31, 22157,  
569 <https://doi.org/10.1364/OE.493557>, 2023.
- 570 Whiteman, D. N.: Examination of the traditional Raman lidar technique. I. Evaluating the  
571 temperature dependent lidar equations, *Appl. Optics*, 42, 2571–2592,  
572 <https://doi.org/10.1364/AO.42.002571>, 2003.
- 573

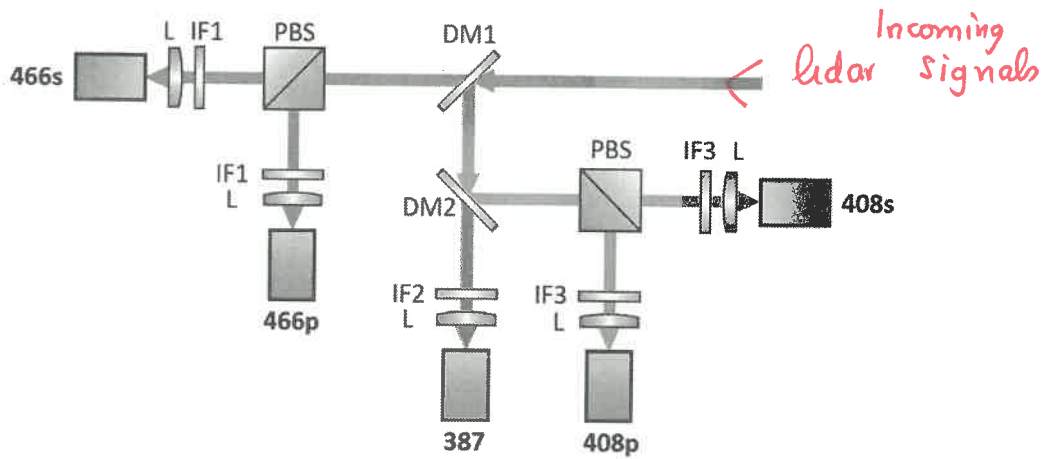

574

575 Fig.1. Optical layout of depolarization measurements at 408 nm and 466 nm wavelengths. L –  
 576 lens; IF1 - IF3 – interference filters, DM1, DM2 – dichroic mirrors, PBS – polarizing cube.

577

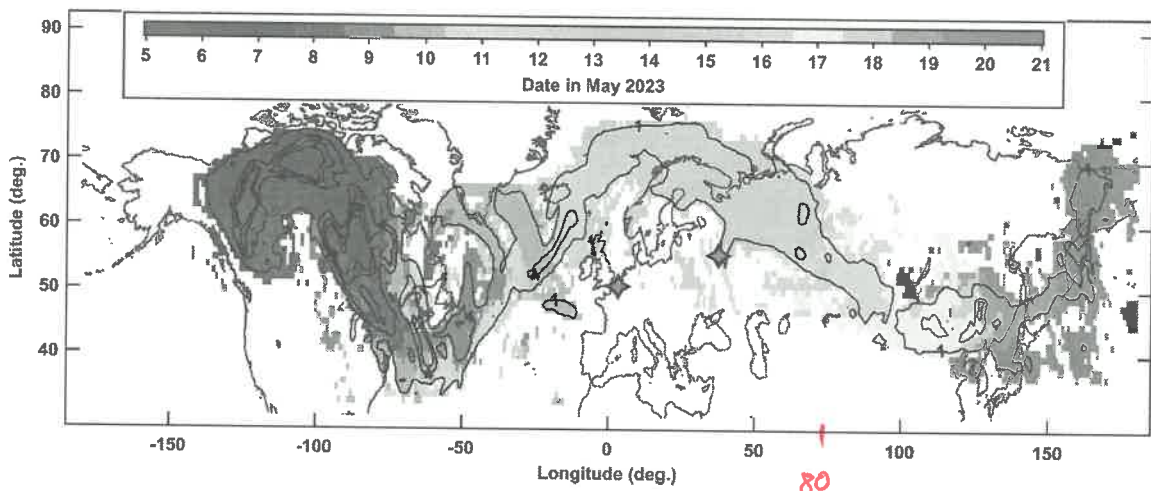

578

579 Fig.2. Spatiotemporal evolution of the smoke plume from the wildfire event in Alberta, Canada on  
 580 5 May 2023. Color-filled time-coded areas indicate the occurrences of Aerosol Index (AI) values  
 581 from OMPS-NPP instrument exceeding 0.5. The actual AI values (1-10) are shown in contours.  
 582 The blue and red-filled stars indicate the location of Lille and Moscow lidar stations respectively.

583

For clarity reasons  
 † Limit the longitude up to 80°!

584  
585

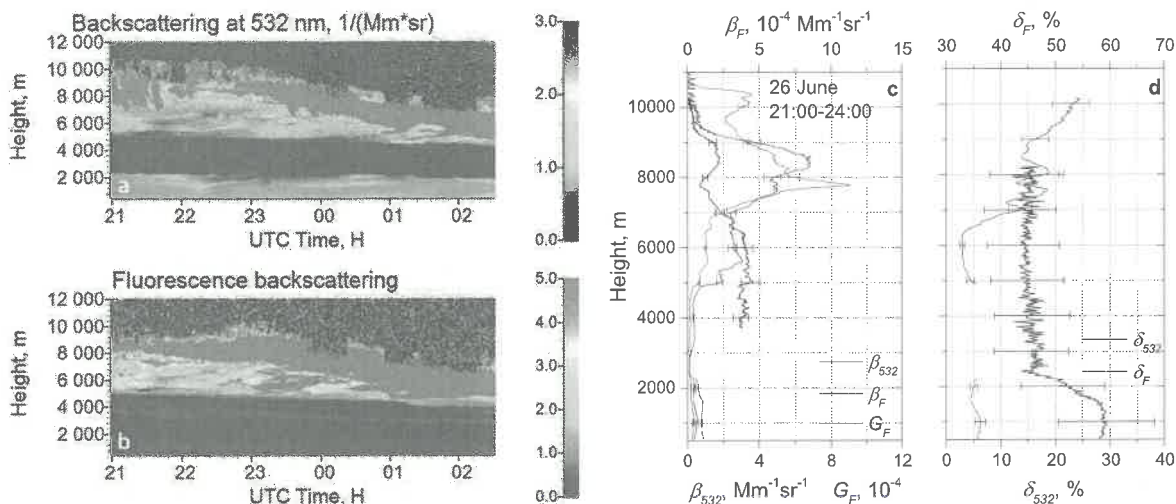

586  
587  
588  
589  
590  
591  
592

Fig.3. Smoke event on the night 26-27 June 2023. Spatio-temporal distributions of (a) aerosol backscattering coefficient  $\beta_{532}$  and (b) fluorescence backscattering  $\beta_F$  (in  $10^{-4} \text{Mm}^{-1}\text{sr}^{-1}$ ). Vertical profiles of (c) the aerosol  $\beta_{532}$  and fluorescence  $\beta_F$  backscattering coefficients, the fluorescence capacity  $G_F$ ; (d) the particle  $\delta_{532}$  and the fluorescence  $\delta_F$  depolarization ratios.

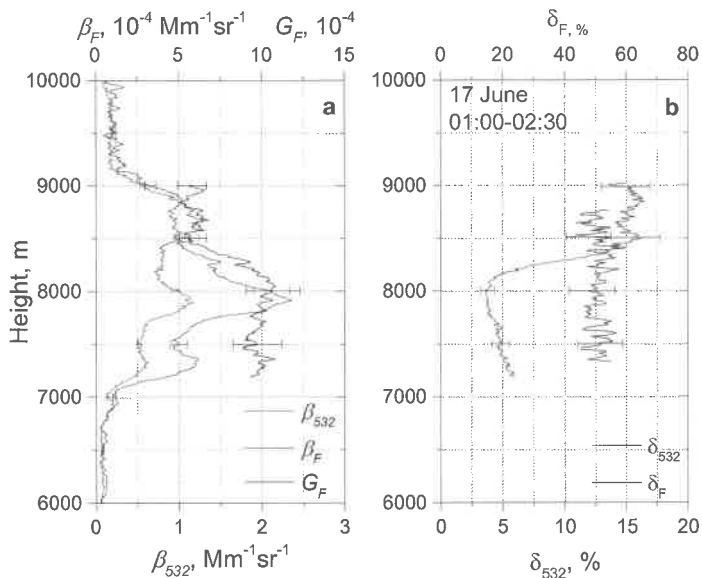

593  
594  
595  
596  
597  
598

Fig.4. Vertical profiles of (a) aerosol  $\beta_{532}$  and fluorescence  $\beta_F$  backscattering coefficients, fluorescence capacity  $G_F$  and (b) particle  $\delta_{532}$  and fluorescence  $\delta_F$  depolarization ratios on the night 16-17 June 2023 for period 01:00-02:30 UTC. *over.... (define city/region)*

599  
600

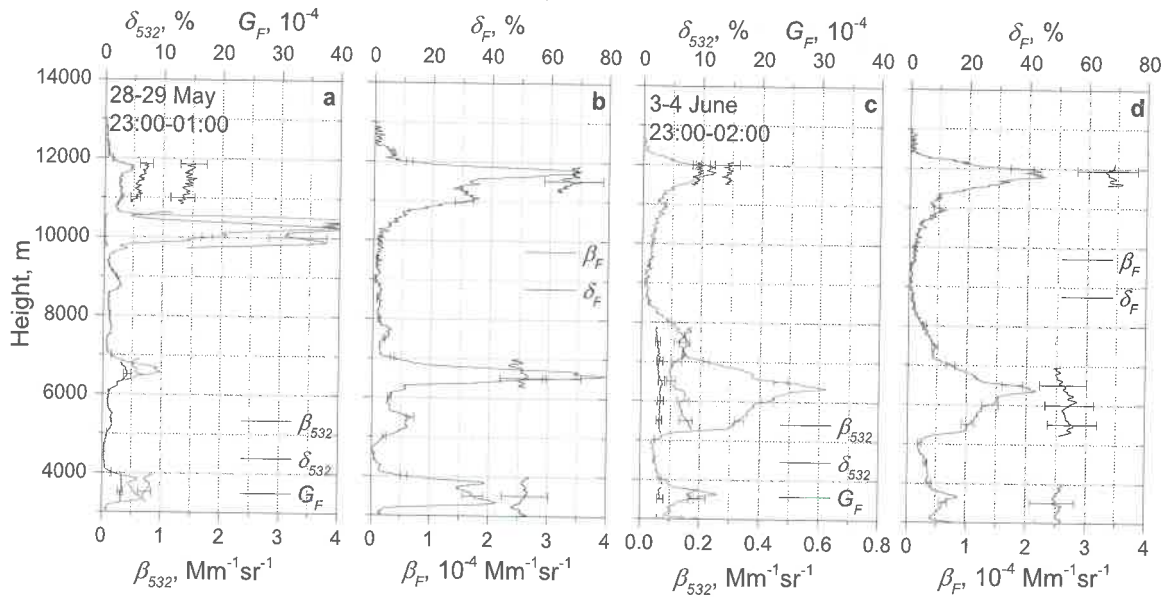

601  
602  
603  
604  
605  
606

Fig.5. Vertical profiles of (a, c) backscattering coefficient  $\beta_{532}$ , particle depolarization ratio  $\delta_{532}$ , fluorescence capacity  $G_F$  and (b, d) fluorescence backscattering  $\beta_F$  and fluorescence depolarization ratio  $\delta_F$  for two smoke episodes on the nights 28-29 May 2023 and 3-4 June 2023, *over. ....*  
*.. define city/region*

607

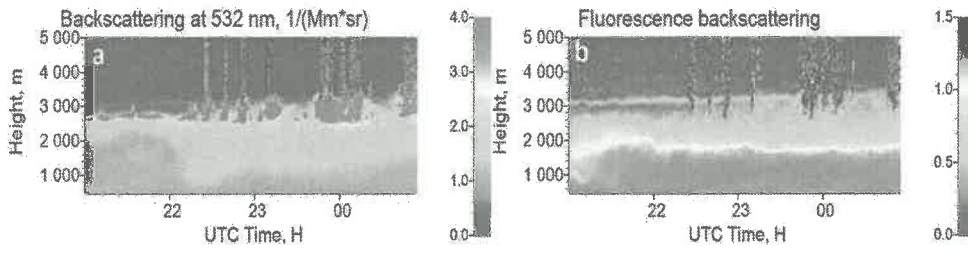

608

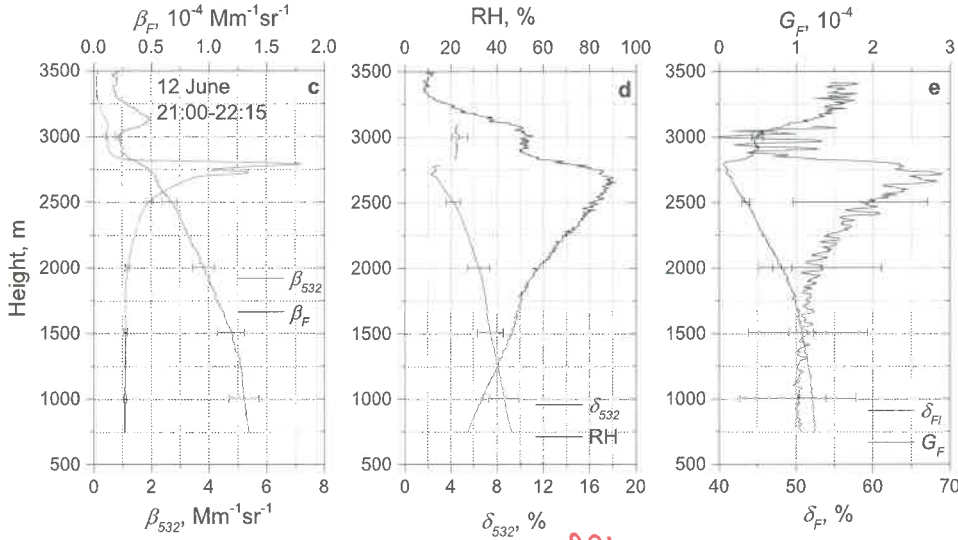

609

610

611

612

613

614

615

616

Fig.6. Particle hygroscopic growth in the ~~boundary layer~~ <sup>PBL</sup> on the night 12-13 June 2023. Spatio-temporal distributions of (a) aerosol backscattering coefficient  $\beta_{532}$  and (b) fluorescence backscattering  $\beta_F$  (in  $10^{-4} \text{ Mm}^{-1}\text{sr}^{-1}$ ). Vertical profiles of (c) aerosol  $\beta_{532}$  and fluorescence  $\beta_F$  backscattering coefficients; (d) particle depolarization ratio  $\delta_{532}$  and the relative humidity RH; (e) fluorescence depolarization ratio  $\delta_F$  and fluorescence capacity  $G_F$  for the time period 21:00-22:15 UTC, over..... define region/city



617  
618  
619

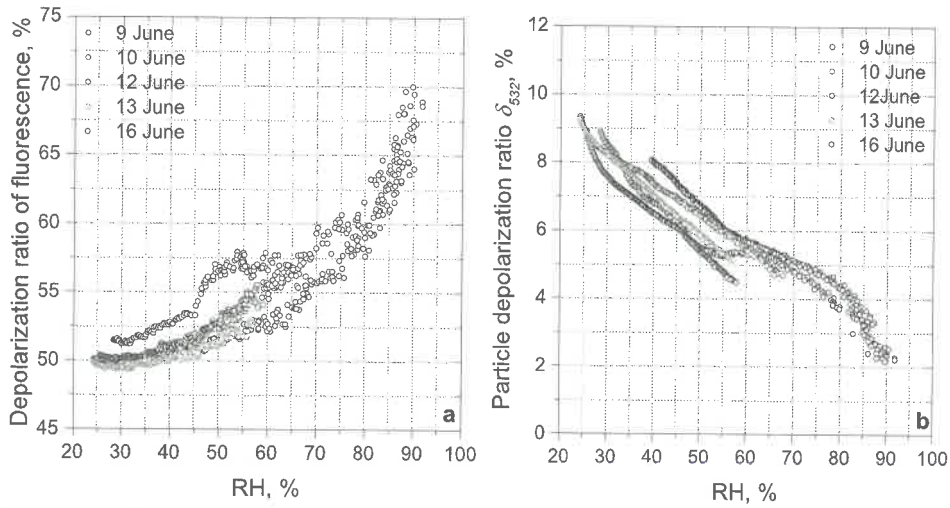

620  
621  
622  
623  
624

Fig.7. (a) Fluorescence depolarization ratio and (b) particle depolarization ratio  $\delta_{532}$  as a function of the relative humidity in the ~~boundary layer~~ *Plume layer PBL* for the measurements on 9, 10, 12, 13, 16 June 2023, *over* *..... define city/region*

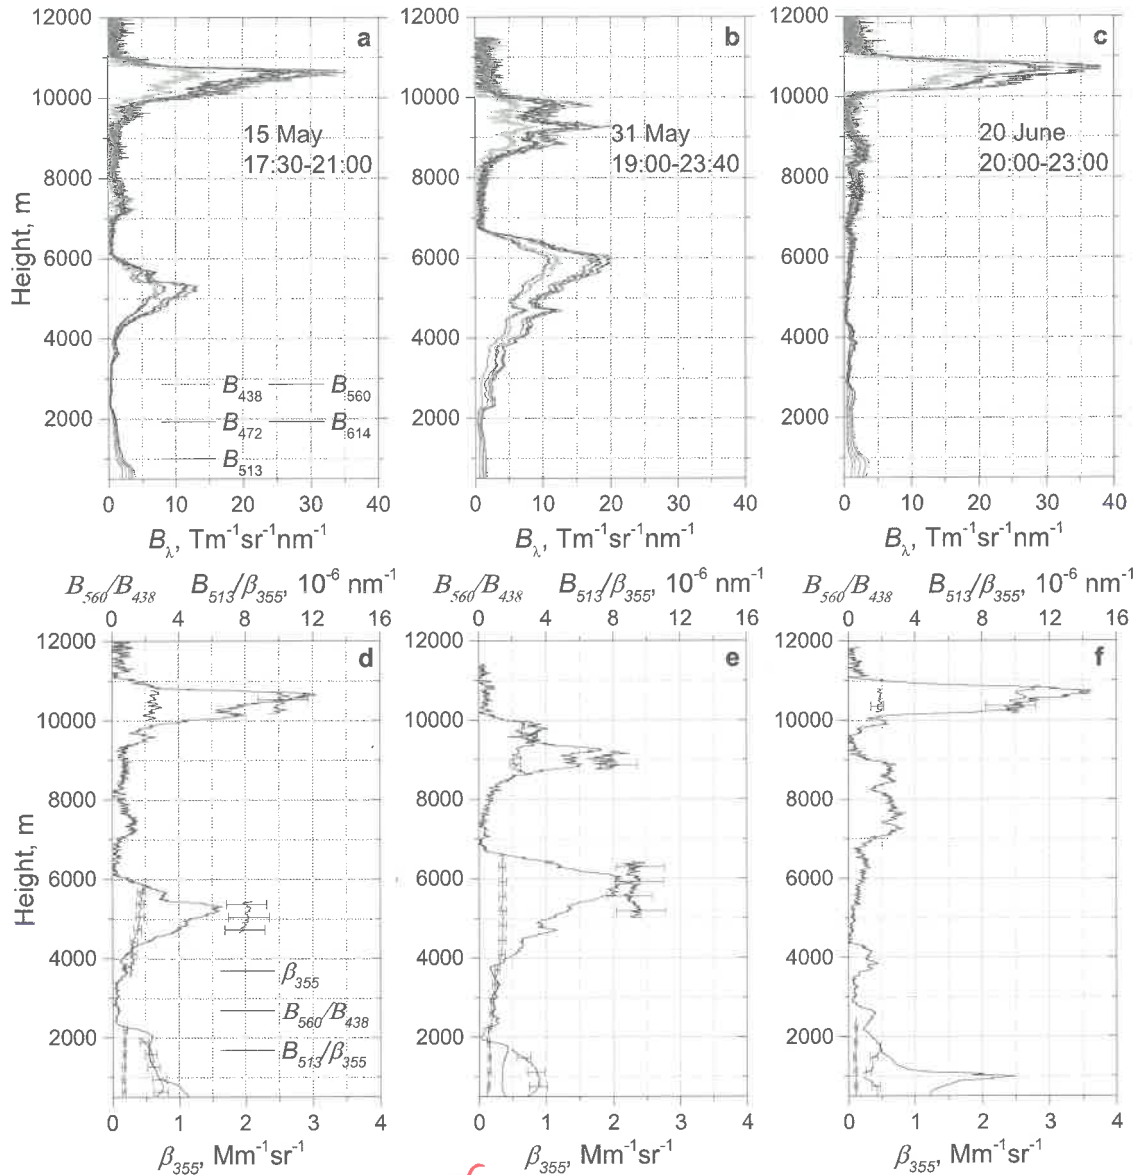

625

626

627

628

629

630

631

Fig. 8. Fluorescence measurements in Moscow on 15 May, 31 May, 20 June 2023. Vertical profiles of (a-c) fluorescence spectral backscattering coefficients  $B_\lambda$  at 438, 472, 513, 560, 614 nm and (d-f) aerosol backscattering coefficient  $\beta_{355}$ , the ratio  $B_{560}/B_{438}$  and  $B_{513}/\beta_{355}$ . Measurements were performed at an angle of 48° to horizon.

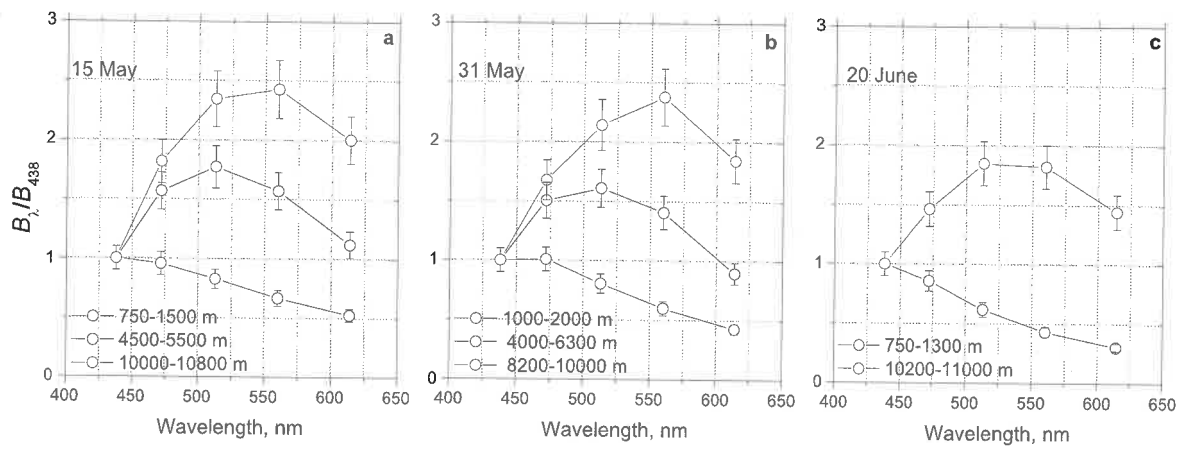

632

633

634

635

Fig.9. Fluorescence spectra  $B_\lambda/B_{438}$  at different height intervals measured during smoke episodes on 15 May, 31 May, 20 June 2023 for the same temporal intervals as in Fig.8, **over Moscow.**

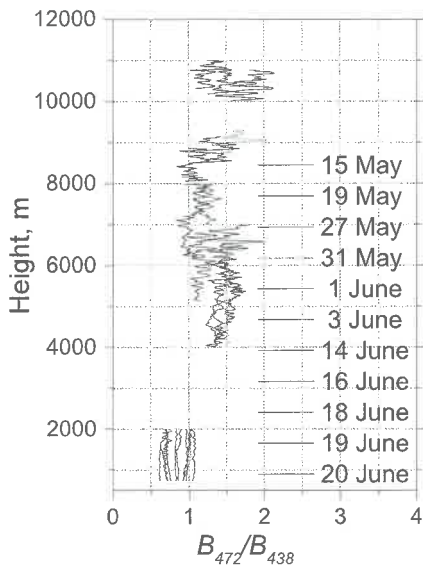

636

637 Fig.10. Height profiles of ratio  $B_{472}/B_{438}$  for smoke episodes during 15 May – 20 June 2023. Smoke  
 638 layers start above 4000 m. *4km up to 11 km.*

639

*over....* *define cities/r-*  
*regions*

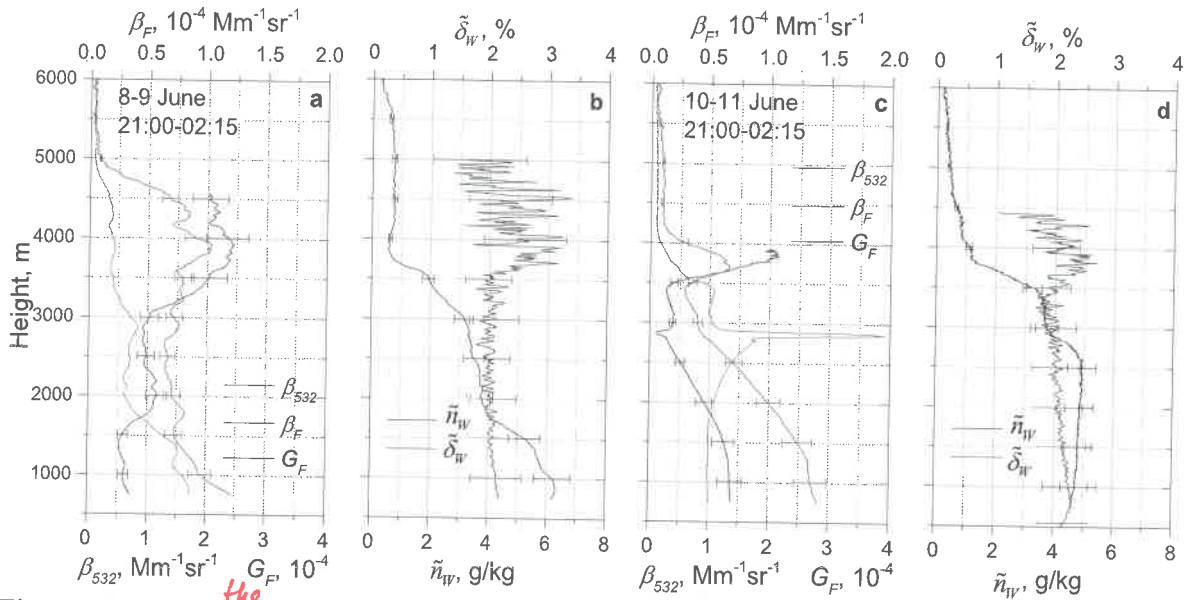

640  
641  
642  
643  
644  
645

Fig.11. Impact of <sup>the</sup> aerosol fluorescence on the depolarization ratio in the water vapor Raman channel on the nights 8-9 and 10-11 June 2023 <sup>over</sup> at Lille. Vertical profiles of (a, c) particle backscattering  $\beta_{532}$ , fluorescence backscattering  $\beta_F$ , fluorescence capacity  $G_F$  and (b, d) depolarization ratio  $\tilde{\delta}_w$  of water vapor Raman signal and the water vapor mixing ratio  $\tilde{n}_w$ .

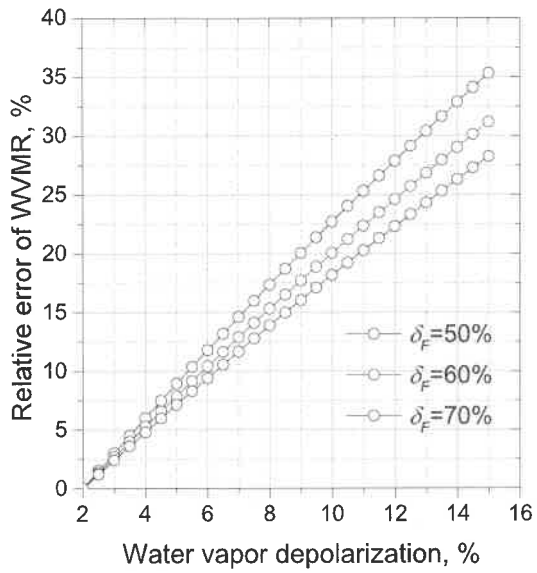

646

647 Fig.12. Relative error of water vapor mixing ratio (WVMR)  $\frac{\Delta n_w}{\tilde{n}_w}$  induced by the fluorescence as

648 a function of depolarization ratio  $\tilde{\delta}_w$  in the water vapor Raman channel for three values of  
 649 fluorescence depolarization ratio  $\delta_F=50\%$ ,  $60\%$ ,  $70\%$ . The depolarization ratio of water vapor  
 650 Raman backscatter in the absence of fluorescence is assumed to be  $\delta_w=2\%$ .

651

652

653  
654

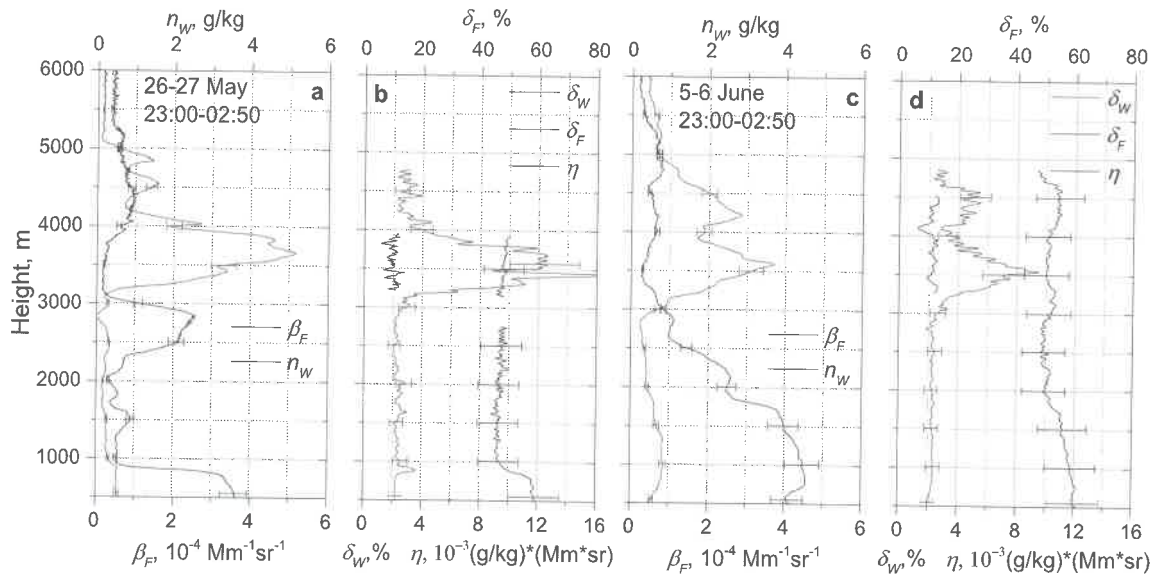

655

656 Fig. 13. Fluorescence measurements <sup>over</sup> in Lille on the night 26-27 May and 5-6 June 2023. (a, c)  
657 Vertical profiles of the fluorescence backscattering  $\beta_F$ , the water vapor mixing ratio  $\tilde{n}_w$ , (b, d) the  
658 depolarization ratio of <sup>the</sup> water vapor Raman signal  $\tilde{\delta}_w$ , the fluorescence depolarization ratio  $\delta_F$  and  
659 parameter  $\eta$ , describing contribution of fluorescence to the water vapor channel.  
660

<sup>the</sup>

661

662

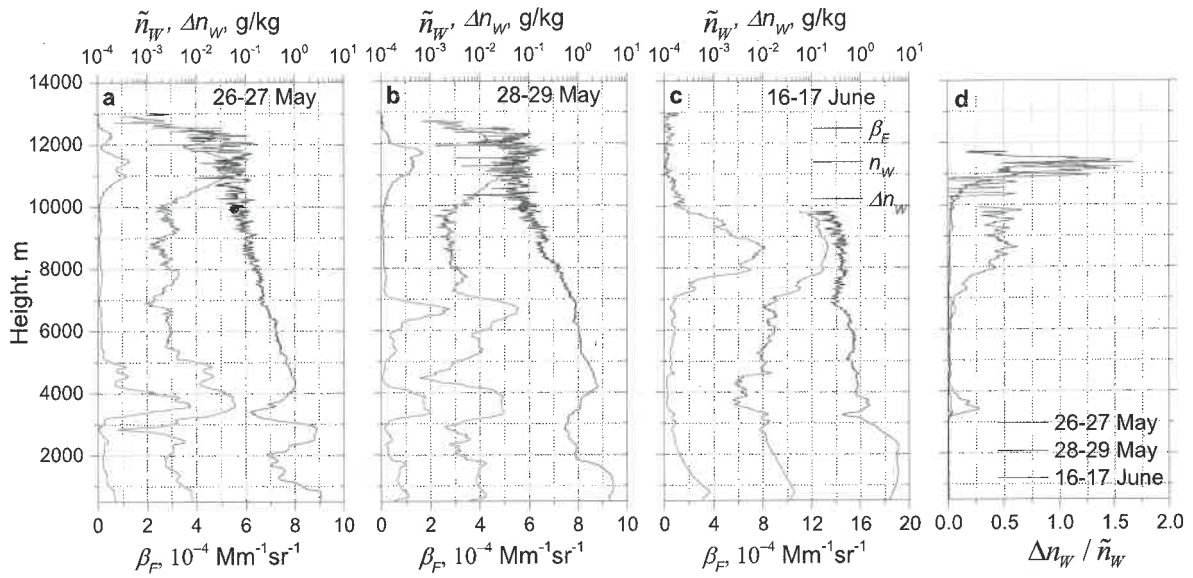

663

664

665

666

667

668

669

Fig.14. Impact of smoke fluorescence on the water vapor measurements. Vertical profiles of *the* fluorescence backscattering  $\beta_F$ , water vapor mixing ratio  $\tilde{n}_W$  and bias in water vapor channel  $\Delta n_W$  provided by the fluorescence of smoke for episodes on the nights (a) 26-27 May, (b) 28-29 May and (c) 16-17 June 2023 for time interval 21:00-02:30 UTC. (d) Error  $\frac{\Delta n_W}{\tilde{n}_W}$  introduced by smoke *the* fluorescence for three episodes.

over ... define city/region.
